# Supplementary material
Source: PubMed Central journal article supplement (PMC7544985)
Supplement: TBSD_A_1817786_SM6988.pdf [file TBSD_A_1817786_SM6988.pdf]

## Supplementary Material

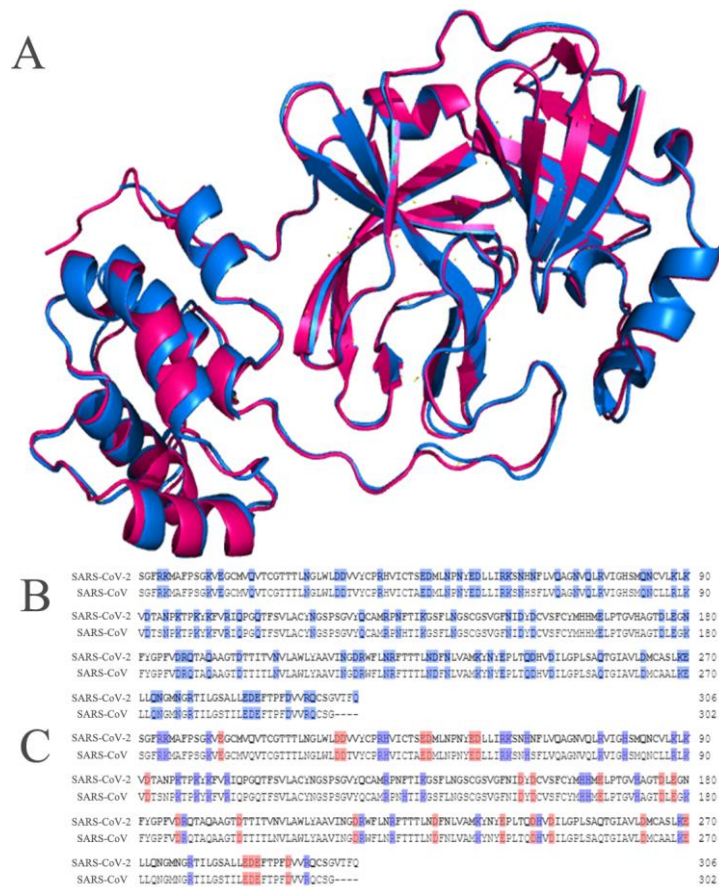

**Figure S1:** 3CL<sup>pro</sup> amino acid sequence and structure analysis. (A) A comparison of two 3CL<sup>pro</sup> structures of SARS-CoV and SARS-CoV-2. 3CL<sup>pro</sup> of SARS-CoV (2Z9J) was shown in blue, and 3CL<sup>pro</sup> of SARS-CoV-2 (6LU7) was shown in red. (B) The 3CL<sup>pro</sup> amino acid sequences of both SARS-Cov and SARS-CoV-2 were compared, and the polar amino acids were marked in blue. (C) Comparison of the 3CL<sup>pro</sup> amino acid sequence of both SARS-Cov and SARS-CoV-2. Negatively charged amino acids were shown in red and positively charged amino acids are shown in red.

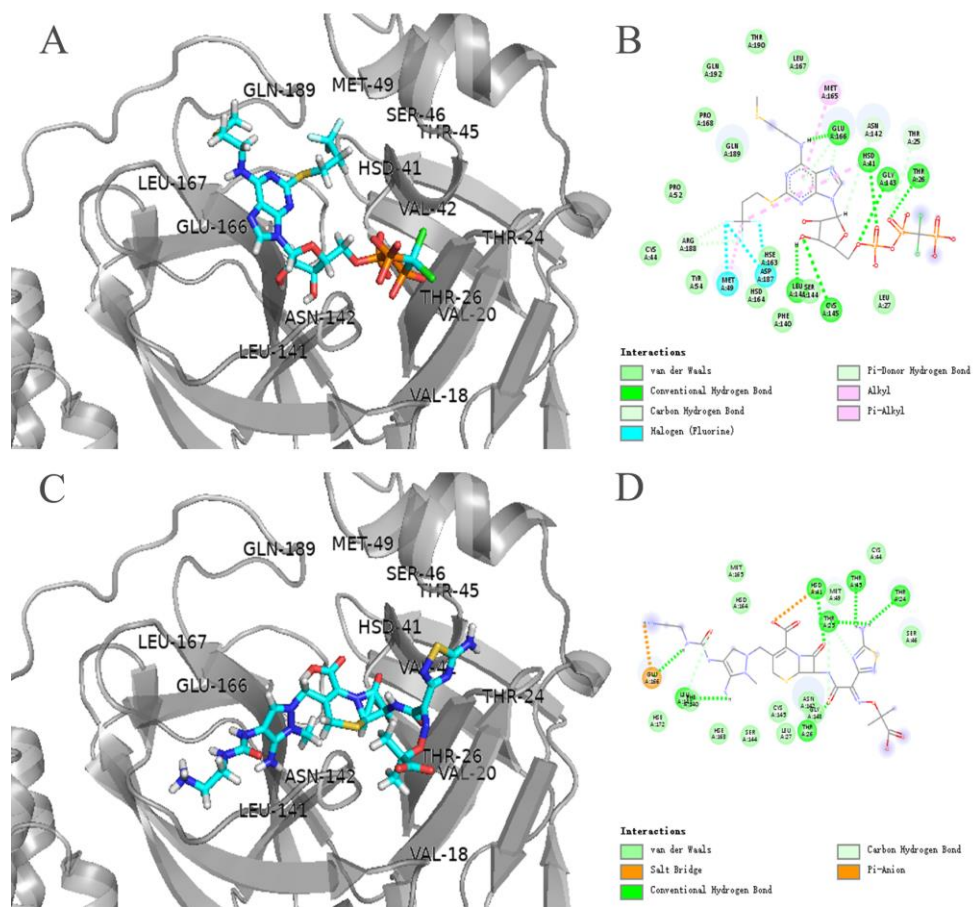

**Figure S2:** Three-dimensional binding modes of Cangrelor and Ceftolozane with 3CL<sup>pro</sup>. (A and C) The three-dimensional binding modes of both Cangrelor and Ceftolozane with 3CL<sup>pro</sup>, respectively Protein shown as a cartoon model and ligands shown as stick model. (B and D) The interaction modes of both Cangrelor and Ceftolozane with 3CL<sup>pro</sup>, respectively.

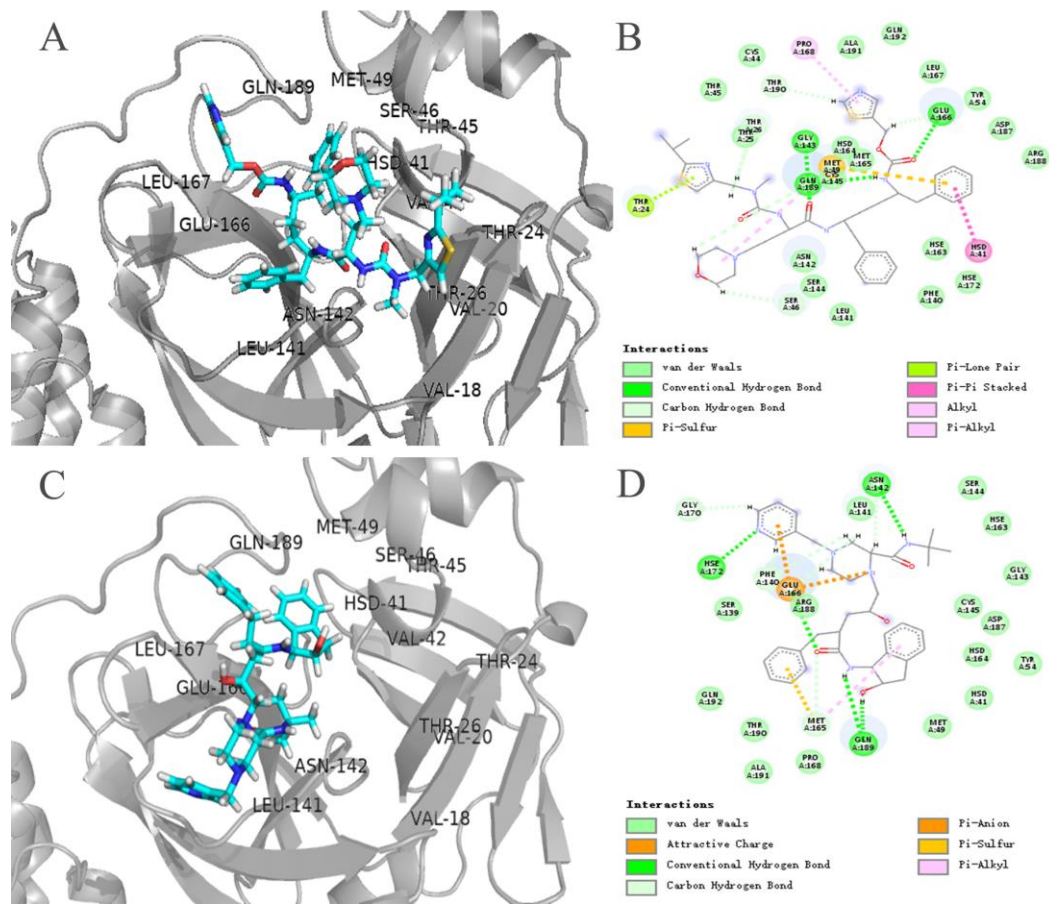

**Figure S3:** Three-dimensional binding modes of Cobicistat and Indinavir with 3CL<sup>pro</sup>. (A and C) The three-dimensional binding modes of both Cobicistat and Indinavir with 3CL<sup>pro</sup>, respectively. Protein shown as a cartoon model and ligands shown as stick model. (B and D) The interaction modes of both Cobicistat and Indinavir with 3CL<sup>pro</sup>, respectively.

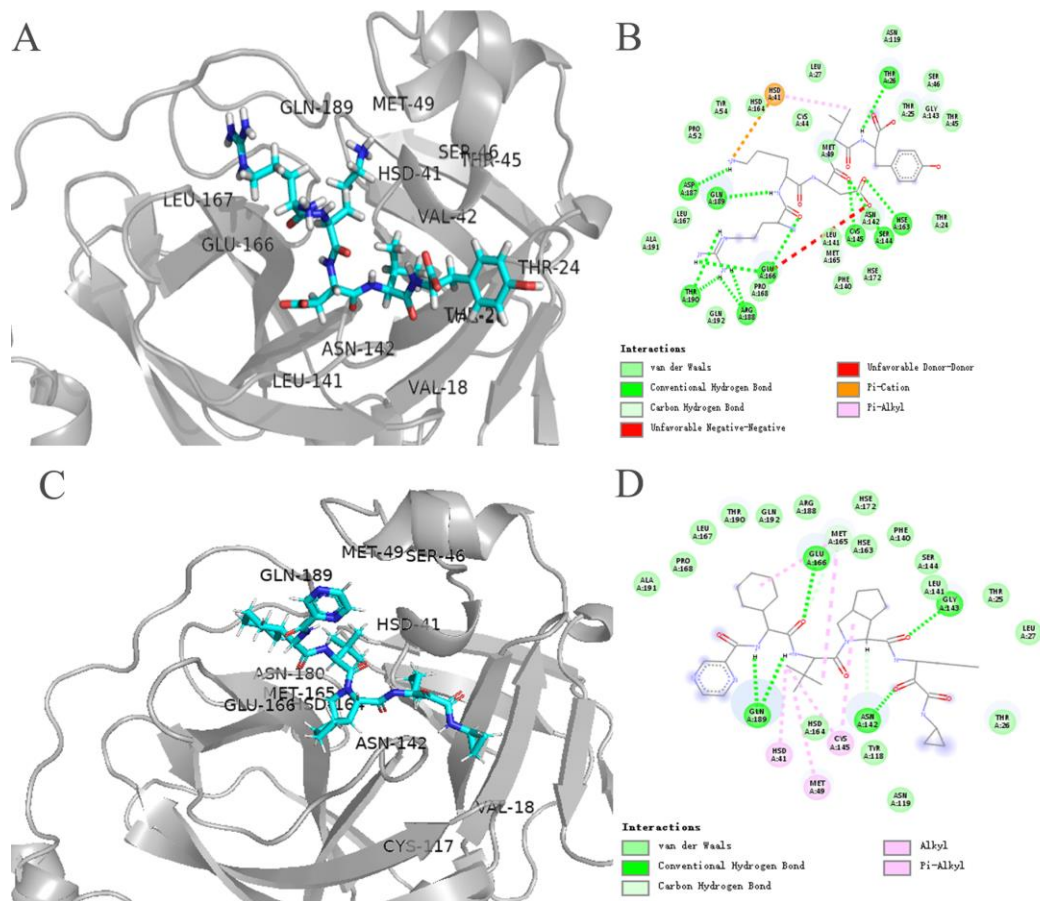

**Figure S4:** Three-dimensional binding modes of Thymopentin and Telaprevir with 3CL<sup>pro</sup>. (A and C) The three-dimensional binding modes of both Thymopentin and Telaprevir with 3CL<sup>pro</sup>, respectively. Protein shown as a cartoon model and ligands shown as stick model. (B and D) The interaction modes of both Thymopentin and Telaprevir with 3CL<sup>pro</sup>, respectively.

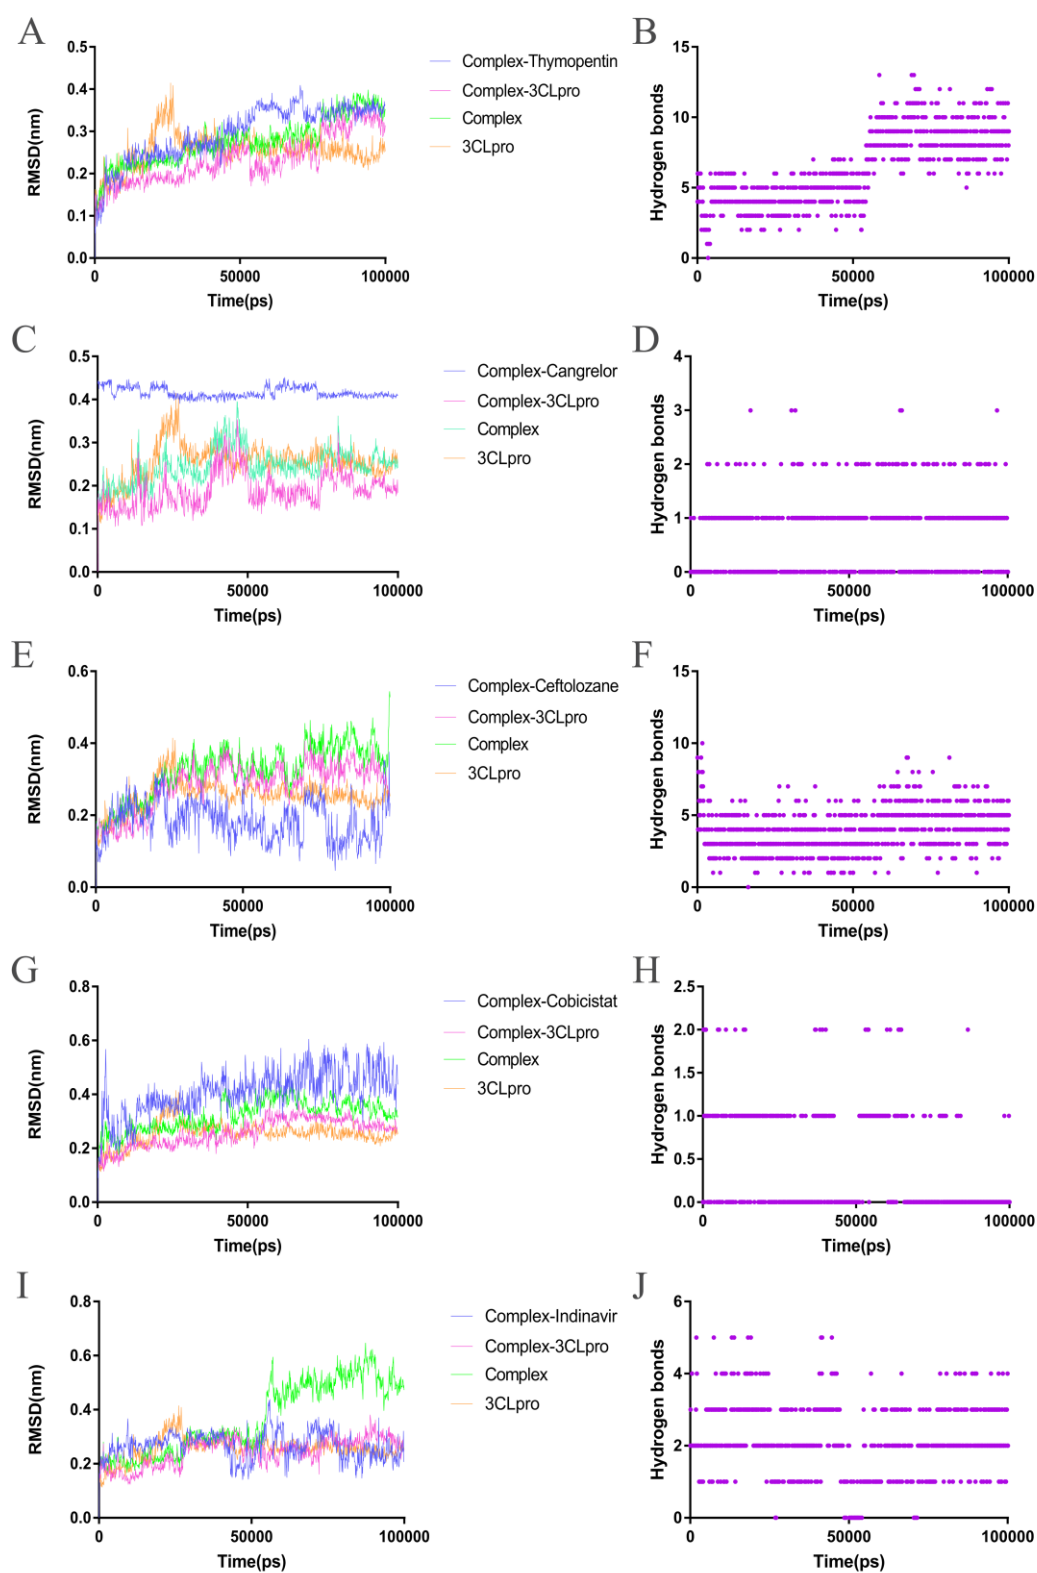

**Figure S5:** Analysis of Molecular Dynamics Simulation results of the free 3CL<sup>pro</sup> and the 3CL<sup>pro</sup>-drug complex. (A) Root Mean Square Deviation (RMSD) of the 3CL<sup>pro</sup>-Thymopentin complex and the free 3CL<sup>pro</sup>. (B) Intermolecular hydrogen

bonds between the Thymopentin and the 3CL<sup>pro</sup>. (C) RMSD of the 3CL<sup>pro</sup>-Cangrelor complex and the free 3CL<sup>pro</sup>. (D) Intermolecular hydrogen bonds between the Cangrelor and 3CL<sup>pro</sup>. (E) RMSD of the 3CL<sup>pro</sup>-Ceftolozane complex and the free 3CL<sup>pro</sup>. (F) Intermolecular hydrogen bonds between the Ceftolozane and 3CL<sup>pro</sup>. (G) RMSD of the 3CL<sup>pro</sup>-Cobicistat complex and the free 3CL<sup>pro</sup>. (H) Intermolecular hydrogen bonds between the Cobicistat and 3CL<sup>pro</sup>. (G) RMSD of the 3CL<sup>pro</sup>-Indinavir complex and the free 3CL<sup>pro</sup>. (H) Intermolecular hydrogen bonds between the Indinavir and 3CL<sup>pro</sup>.

**Movie 1:** Molecular dynamics simulation of the docking complex of Viomycin and 3CL<sup>pro</sup>. Surface represents 3CL<sup>pro</sup>, and sticks represent Viomycin.

**Movie 2:** Molecular dynamics simulation of the docking complex of Capastat and 3CL<sup>pro</sup>. Surface represents 3CL<sup>pro</sup>, and sticks represent Ritonavir.

**Movie 3:** Molecular dynamics simulation of the docking complex of Ritonavir and 3CL<sup>pro</sup>. Surface represents 3CL<sup>pro</sup>, and sticks represent Ritonavir.

**Movie 4:** Molecular dynamics simulation of the docking complex of Lopinavir and 3CL<sup>pro</sup>. Surface represents 3CL<sup>pro</sup>, and sticks represent Lopinavir.

**Movie 5:** Molecular dynamics simulation of the docking complex of Carfilzomib and 3CL<sup>pro</sup>. Surface represents 3CL<sup>pro</sup>, and sticks represent Carfilzomib.

**Movie 6:** Molecular dynamics simulation of the docking complex of Saquinavir and 3CL<sup>pro</sup>. Surface represents 3CL<sup>pro</sup>, and sticks represent Saquinavir.
